1 **An effective workshop on “How to be an Effective Mentor for Underrepresented STEM**  
2 **Trainees”**

3 Andrea G. Marshall<sup>1\*</sup>, Zer Vue<sup>1\*</sup>, Caroline B. Palavicino-Maggio<sup>2\*</sup>, Elsie C. Spencer<sup>3</sup>, Heather K.  
4 Beasley<sup>1</sup>, Edgar Garza-Lopez<sup>4</sup>, Zachary Conley<sup>5</sup>, Kit Neikirk<sup>6</sup>, Sandra A. Murray<sup>7</sup>, Denise Martinez<sup>8</sup>,  
5 Jamaine Davis<sup>9</sup>, Lillian Brady<sup>10</sup>, Haysetta D. Shuler<sup>11#</sup>, Derrick Morton<sup>12#</sup>, Antentor Hinton, Jr.<sup>1,4#</sup>

6 **Author Information**

7 1 Department of Molecular Physiology and Biophysics, Vanderbilt University, Nashville, TN

8 2 Department of Neurobiology, Harvard Medical School, Boston, MA

9 3 Teachers College, Columbia University, New York, NY, 10027 USA

10 4 Hinton and Garza Lopez Family Consulting Company, Iowa City, IA

11 5 Collaborative for STEM Education and Outreach, Department of Teaching and Learning, Vanderbilt  
12 University, Nashville, TN

13 6 Department of Biology, University of Hawaii, Hilo, HI

14 7 Department of Cell Biology, University of Pittsburgh School of Medicine, Pittsburgh, PA

15 8 Department of Family Medicine, Carver College of Medicine, University of Iowa, Iowa City, IA

16 9 Department of Biochemistry, Cancer Biology, Neuroscience and Pharmacology, School of Medicine,  
17 Meharry Medical College, Nashville, TN

18 10 Department of Pharmacology, Vanderbilt University, Nashville, TN

19 11 Department of Biological Sciences, Winston-Salem State University, Winston-Salem, NC

20 12 Department of Biological Sciences, University of Southern California, Los Angeles, CA

21 \*These authors share co-first authorship

22 #These authors share co-senior authorship

23 Co-Corresponding Author: [antentor.o.hinton.jr@vanderbilt.edu](mailto:antentor.o.hinton.jr@vanderbilt.edu)

24 Co-Corresponding Author: [mortond@usc.edu](mailto:mortond@usc.edu)

25

26 **Abstract**

27 Despite an increase in programming to promote persons excluded by their ethnicity or race  
28 (PEER) scholars, minorities remain underrepresented in many STEM programs. The academic  
29 pipeline is largely leaky for underrepresented minority (URM) scholars due to a lack of effective  
30 mentorship. Many URM students experience microaggressions and discrimination from their  
31 mentors due to a lack of quality mentorship training. In this workshop, we provide a framework  
32 for how to be an effective mentor to URM trainees. Mentees, especially URM trainees, can  
33 flourish in effective mentoring environments where they feel welcomed and can comfortably  
34 develop new ideas without feeling threatened by external factors. Effective mentoring  
35 environments provide motivational support, empathy, cultural competency, and successful  
36 training.

37 **Keywords** Diversity, STEM, Professional Development, Higher Education, Mentorship,  
38 Culturally Supportive, Cultural Competence

39

## 40 **The framework of the workshop**

41           Designing an effective mentorship workshop requires examples of the characteristics of  
42 effective mentors of underrepresented minority (URM) trainees, a blueprint for selecting mentees  
43 based on the mentorship environment, and strategies for maintaining nurturing mentor-mentee  
44 relationships. Mentor-mentee relationships require navigating unique challenges to ensure the  
45 success of URM trainees. Frequently, URM students face microaggressions, imposter fear, and  
46 difficulties in building networks and mentorship relationships, which increase the risk of falling  
47 out of the academic pipeline (Hinton Jr *et al.* 2020a; National Academies of Sciences 2020;  
48 Shuler *et al.* 2021; Uddin and De Los Reyes 2021). Despite the nature of these challenges, based  
49 on scientific findings, URM trainees perform better under supportive mentorship relationships,  
50 which can help them overcome the daily challenges that deters them from staying in the  
51 academic pipeline (Hinton Jr *et al.* 2020a; Termini *et al.* 2021a).

52           During the workshop strategies were presented to help potential mentors identify best  
53 practices for effective and motivational mentoring. The importance of celebrating the mentee and  
54 their journey was emphasized in the workshop. Furthermore, the mentor was provided strategies  
55 for identifying mentees in need of special guidance. These strategies encouraged mentors to  
56 reframe how they think about students, work to have a more authentic mentor-mentee  
57 relationships, and develop a motivation-based mentoring approach based on emotional  
58 intelligence (Gardenswartz, Cherbosque and Rowe 2010; Opengart and Bierema 2015;  
59 Montgomery 2017; Hinton *et al.* 2020; Hinton Jr *et al.* 2020b; Shuler *et al.* 2021).

60 In the workshop, all participants were presented with a model of intentional mentorship. This  
61 mentoring model emphasizes a willingness to learn and establish credibility while facilitating the

62 formation of positive relationships through networking (Shuler *et al.* 2021). Workshop  
63 participants were also exposed to effective and ineffective mentorship practices (Neikirk 2021).  
64 Furthermore, the workshop discussed using motivational mentoring as a way to cultivate the  
65 mentee's spirit of excellence as they navigate their career development -- through the use of  
66 individual development plans (IDP) (National Academies of Sciences 2020; Shuler *et al.* 2021).  
67 These strategies are especially useful for mentees during times of hardship, such as classroom  
68 challenges. (McReynolds *et al.* 2020; Termini *et al.* 2021b).

69

## 70 **Introduction**

71 Mentoring relationships are essential for the development of a mentee's career, especially those  
72 from URM groups. Successful mentoring requires environments that bolster motivational  
73 ambition, provides empathy, and utilizes cultural competency. Toxic mentoring environments  
74 arise from poor communication, lack of commitment and experience, conflicting personalities,  
75 perceived competition, poor perceived performance, and difficulty in forming interpersonal  
76 connections with the mentee.

### 77 **Key goals for successfully mentoring diverse trainees:**

- 78 • Practice meditation and mindfulness
- 79 • Be aware of your own biases
- 80 • Create a positive environment
- 81 • Respond, do not react

- 82 • Promote self-motivation, encompass your inner resources to act, reach, and achieve goals
- 83 and aspirations
- 84 • Provide constructive, not deconstructive, criticisms
- 85 • Cultural competence

## 86 **Motivational Support: How to motivate and support diverse trainees simultaneously?**

87 Motivation is the inner drive to excel, which is often changed by internal and/or external conflict.  
88 This inner drive is important for cultivating goals and providing direction. A trainee's motivation  
89 governs the direction of their behavior in any mentoring environment, such as their effort, grit,  
90 and attitude. Minority trainees not only face external barriers during their educational and career  
91 journey, such as toxic mentorship and institutional inequities, but also experience internal  
92 challenges, such as John Henryism (Rolle *et al.* 2021). Furthermore, URM's also face barriers  
93 including imposter fear, also known as imposter syndrome, which is discussed in the workshop  
94 as a stigmatizing word that places the issue on the individual as opposed to the environment  
95 (Hinton Jr *et al.* 2020b; Rolle *et al.* 2021). These barriers stimulate a lack of confidence, which  
96 affects their perseverance. Since all trainees have different motivations, mentors should  
97 personalize their mentorship approach based on their mentee's goals and motivations. A single  
98 mentorship strategy is often insufficient for a diverse group of mentees. Mentees differ  
99 physically and emotionally, including in their motor, moral, and learning abilities.

100 Mentors set an example for their trainees. Quality mentoring comes from being an inspiration  
101 (Shuler *et al.* 2021). Mentorship is an investment, not only to their institutions but to society as  
102 their mentees may make substantial contributions (Hinton Jr *et al.* 2020b; Shuler *et al.* 2021).  
103 Thus, the mentor's character can play a big role in how mentees view themselves. An inspiring

104 mentor listens, serves, shares, focuses on positivity, stays authentic, is willing to learn, and  
105 remains humble. Minority trainees excel with positive reinforcement. Mentors foster positivity in  
106 their relationships with mentees. Mentors must also identify and restrain negative beliefs that  
107 may influence their guidance and be willing to accept constructive feedback.

### 108 **Providing support and empathy**

109 Mentors need to invest time in getting to know their mentees. Active listening is as important as  
110 intentional mentoring. An effective mentor sets aside time to speak with their mentees and pays  
111 attention to what they have to say (Shuler *et al.* 2021). Active listening, instead of passive  
112 listening, entails action. For example, if your mentee makes you aware of a concern or question,  
113 the mentor might not have an answer to a specific situation, which would require seeking out  
114 advice from their network. Intentional listening is essential to effectively communicate with  
115 mentees. For example, if a mentor does not completely understand their trainees' questions or  
116 concerns, the mentor may consider asking for clarification, which ensures a clear line of  
117 communication between the mentor and mentee (Shuler *et al.* 2021). Active listening also  
118 requires avoiding distractions, such as emails, while providing their mentees with undivided  
119 attention. Focus on clarifying the situation to best provide an answer or suggestion. It is also  
120 important that a mentor maintains an open mind. Obstacles and setbacks are a good way for  
121 mentees and mentors to grow and develop their skills.

122 Furthermore, each challenge is unique. Although mentees may be of the same gender,  
123 racial/ethnic background, socio-economic background, or school systems, they are all individuals  
124 with different journeys and motivations. No racial/ethnic group is monochromatic, hence it is  
125 essential to develop a personalized individual development plan (IDP) (Hinton Jr *et al.* 2020b).

126 Effective mentors also seek to maintain transparency by breaking down communication barriers,  
127 including seeking out alternative approaches, media, or technology to carry out conversations.  
128 It is also important for mentors to focus on developing their emotional intelligence (EI), which is  
129 also known as emotional quotient or emotional intelligence quotient (Hinton Jr *et al.* 2020b,  
130 Shuler *et al.* 2021). Emotional intelligence is the ability of understanding feelings, emotional  
131 language, and signals conveyed by emotions (Hinton Jr *et al.* 2020b, Shuler *et al.* 2021). It  
132 involves distinguishing and managing our personal feelings and interactions from those of other  
133 people (Hinton Jr *et al.* 2020b, Shuler *et al.* 2021). Furthermore, it assists with managing your  
134 behavior, navigating social areas, and helping others make critical life choices (Hinton Jr *et al.*  
135 2020b, Shuler *et al.* 2021). Emotional intelligence also helps identify personal biases in thinking  
136 (Hinton Jr *et al.* 2020b, Shuler *et al.* 2021). It is like a window that helps determine why a  
137 mentee or colleague behaves a certain way or avoids making certain decisions. Practicing  
138 empathy towards their mentees can help mentors and mentees communicate more efficiently.

### 139 **Cultural competency and training**

140 Cultural competence is the knowledge and skills needed to work with a diverse group in a  
141 meaningful relevant and productive way. Cultural competence involves an understanding of the  
142 role of religion, community, and culture in the lives and careers of underrepresented minority  
143 mentees. Mentors should familiarize themselves with common racial insensitivities and develop  
144 methods to ask questions on these topics with sensitivity and avoid perpetuating racial macro-  
145 and microaggressions.

146 Based on these concepts, we tested how students perceived the information and whether they  
147 could apply it to their career development and individual development plan. In this particular

148 questionnaire, we used four questions to gauge interest. The questions consisted of a 10-point  
149 scale that was based on rating the following concepts: overall presentation, support team, verbal  
150 and nonverbal communication skills, and networking.

151



## 152 **Methods**

153 Twenty-four students from Winston-Salem State University (a historically Black public  
154 university) attended a 90-minute virtual workshop. The participants completed an anonymous  
155 questionnaire before and after the workshop to gauge their expectations and satisfaction  
156 regarding the workshop (Table 1). The data were compared using nonparametric Wilcoxon  
157 matched-pairs and signed-rank tests to determine differences between measures. Differences  
158 were considered statistically significant when P values were less than 0.05. \*\*\*\*P < 0.0001;  
159 \*\*\*P < 0.001; \*\*P < 0.01; \*P < 0.05; NS, not significant P > 0.05; NS (not significant).

## 160 **Results**

161 We summarized the data from the questionnaires using box and whisker plots in which  
162 the red centerline denotes the median, and error bars denote the standard error. Individual values  
163 are represented by circles. Overall, participant feedback was positive. Responses to the pre-  
164 workshop questionnaires suggest that mentees did not initially believe the workshop would be  
165 beneficial (Figure 1A-D, Pre-Test). The data suggests that their low expectations may be a result  
166 of low exposure or lack of mentorship.

167 Importantly, inconsistent mentorship may alter the mentee trajectories (Packard 2003;  
168 Thomas, Willis and Davis 2007; Janis and Barker 2016). However, after the workshop, feedback  
169 scores increased by an average of 5.2 points on a 10-point scale. The median score was a 9 or  
170 higher for every question asked (Figure 1A-D, Post-Test), indicating that the workshop was  
171 found favorable and helpful for identifying mentors or considering mentors for other parts of  
172 their lives.

173 All post-workshop questionnaires show a significant difference compared with pre-  
174 workshop questions. Initially, on average, participants believed the workshop to be low to  
175 moderately informative with an average evaluation of 4.1 (Figure 1A, Pre-Test). Following the  
176 workshop, the average score increased by 4.8 to an overall average of 8.9, indicating most  
177 participants enjoyed the workshop (Figure 1A, Post-Test). Similarly, the average initial score for  
178 believing the workshop would help improve communication skills was 5.2 (Figure 1B, Pre-Test).  
179 Post-workshop, the average score increased by 4.8 points to an average of 9.9 (Figure 1B, Post-  
180 Test). The belief that the workshop would increase networking skills increased by 5.6 points; the  
181 average pre-test score was 3.9, while the average post-test score was 9.5 (Figure 1C). More so,  
182 initially, participants did not strongly believe the workshop would underscore the importance of  
183 having a support team, giving an average score of 3.6 (Figure 1D, Pre-Test). Following the  
184 workshop, this score rose by 5.7 to an average of 9.3 (Figure 1D, Post-Test). The metrics  
185 measured showed that, on average, mentees found the workshop informative and beneficial to  
186 developing their networking, communication, and collaboration skills (Figure 1A-D, Post-Test).

187 These workshops allow for trainees to explore concepts about adequate mentorship  
188 (Figure 1A-D). It is possible to interpret the data that initially students did not see the benefit of  
189 the workshop because they may have felt it was not specifically targeting them or irrelevant to  
190 their goals of developing a career at the undergraduate level (Figure 1A-D, Pre-Test). It is  
191 important to highlight that the students did achieve a sense of award from gleaning new  
192 information about mentorship. Taken together, these results suggest that career development  
193 workshops focused on mentorship may have a large impact on student development and  
194 performance level at the undergraduate level (Figure 1A-D).

195 **Discussion**

196 Mentoring is an important aspect of a mentee's career, especially those from URM groups  
197 (Hinton Jr *et al.* 2020a, 2020b). Taken together, the data from the questionnaire highlights the  
198 need for more career development opportunities focused on mentorship. This workshop also  
199 provided an opportunity for self-reflection for students to understand the importance of mentors  
200 and how they may be an important asset to achieving career goals. This workshop also provided  
201 a unique understanding of different mentoring practices, and which may be most effective or  
202 ineffective in a mentee-mentor relationship. Initially, enthusiasm for this type of program was  
203 low and students thought career development workshops were not essential to their development  
204 (Figure 1A-D, Pre-Test). However, the post-test results suggest that the students found this  
205 workshop offered a robust set of strategies and tools to use in their career development and an  
206 understanding of what type of mentor-mentee relationships they may need (Figure 1A-D, Post-  
207 Test).

208         Although our sample size was small, the data suggests that career development  
209 workshops are important for career advancement. We would further speculate that career  
210 advancement can be done within mentee-mentor relationships, as well as, through skill and  
211 knowledge-building workshops. We also suggest that students who experienced this workshop  
212 can improve their overall skill set and help build an understanding of the need for introspection  
213 and evaluation of what may be helpful in their career advancement.

214         However, our dataset does not reflect a large stratification of participants by race and  
215 ethnicity, age, or sex. We suggest these workshops be given in other languages based on  
216 institutional demographics to effectively communicate the importance of career development to  
217 non-native speakers. Additionally, our study participants, although involved in STEM fields,  
218 may not represent the entire student-body population. Thus, we suggest that this workshop and

219 others be used to create a series of longitudinal studies to further enrich undergraduate career  
220 development initiatives across a wide variety of demographics. Equally, we suggest that  
221 workshops like these continue to be a resource to URM individuals and others that do not have  
222 access to career development opportunities. These workshops should be available as open access  
223 to disseminate the information and help broaden the true participation and motivation needed to  
224 pursue a STEM career. Furthermore, additional studies are needed to identify additional areas  
225 that may aid in student success.

#### 226 **Availability of data and materials**

227 A PowerPoint presentation of the workshop is available in English and Spanish upon request.

228 Survey data may be made available upon reasonable request.

229

## 230 **References**

- 231 Gardenswartz L, Cherbosque J, Rowe A. Emotional intelligence and diversity: A model for  
232 differences in the workplace. *Journal of Psychological Issues in Organizational Culture*  
233 2010;**1**:74–84.
- 234 Hinton AO, McReynolds MR, Martinez D *et al.* The power of saying no. *EMBO Rep* 2020;**21**,  
235 DOI: 10.15252/embr.202050918.
- 236 Hinton Jr AO, Termini CM, Spencer EC *et al.* Patching the leaks: Revitalizing and reimagining  
237 the STEM pipeline. *Cell* 2020a;**183**:568–75.
- 238 Hinton Jr AO, Vue Z, Termini CM *et al.* Mentoring minority trainees: minorities in academia  
239 face specific challenges that mentors should address to instill confidence. *EMBO reports*  
240 2020b;**21**:e51269.
- 241 Janis JE, Barker JC. Medical student mentorship in plastic surgery: the mentor’s perspective.  
242 *Plastic and reconstructive surgery* 2016;**138**:925e–35e.
- 243 McReynolds MR, Termini CM, Hinton AO *et al.* The art of virtual mentoring in the twenty-first  
244 century for STEM majors and beyond. *Nature Biotechnology* 2020;**38**:1477–82.
- 245 Montgomery BL. Mapping a mentoring roadmap and developing a supportive network for  
246 strategic career advancement. *Sage Open* 2017;**7**:2158244017710288.
- 247 National Academies of Sciences E and Medicine. The science of effective mentorship in  
248 STEMM. 2020.
- 249 Neikirk K. Unique struggles and the ways mentorship can fail. *Cell Mentor* 2021.
- 250 Opengart R, Bierema L. Emotionally intelligent mentoring: Reconceptualizing effective  
251 mentoring relationships. *Human Resource Development Review* 2015;**14**:234–58.
- 252 Packard BW-L. Web-based mentoring: Challenging traditional models to increase women’s  
253 access. *Mentoring and Tutoring* 2003;**11**:53–65.
- 254 Rolle T, Vue Z, Murray S *et al.* Toxic stress and burnout: John henryism and social dominance  
255 in the laboratory and STEM workforce. *Pathogens and Disease* 2021, DOI:  
256 10.1093/femspd/ftab041.
- 257 Shuler H, Cazares V, Marshall A *et al.* Intentional mentoring: maximizing the impact of  
258 underrepresented future scientists in the 21st century. *Pathogens and Disease*  
259 2021;**79**:ftab038.
- 260 Termini CM, Hinton Jr AO, Garza-López E *et al.* Building Diverse Mentoring Networks that  
261 Transcend Boundaries in Cancer Research. *Trends in Cancer* 2021a.

262 Termini CM, McReynolds MR, Rutaganira FU *et al.* Mentoring during Uncertain Times. *Trends*  
263 *in Biochemical Sciences* 2021b.

264 Thomas KM, Willis LA, Davis J. Mentoring minority graduate students: Issues and strategies for  
265 institutions, faculty, and students. *Equal Opportunities International* 2007.

266 Uddin LQ, De Los Reyes A. Cultivating allyship through casual mentoring to promote diversity.  
267 *Trends in Cognitive Sciences* 2021.

268

## 269 **Acknowledgements**

270 We thank the 24 students who participated in our survey.

## 271 **Funding**

272 This work was supported by the UNCF/BMS EE Just Grant, Burroughs Wellcome Fund CASI  
273 Award, Burroughs Welcome Fund Ad-hoc Award, NIH SRP Subaward to #5R25HL106365-12  
274 from the NIH PRIDE Program, DK020593, Vanderbilt Diabetes and Research Training Center  
275 for DRTC Alzheimer's Disease Pilot & Feasibility Program, UNCF/BMS EE Just Faculty Fund  
276 Grant awarded to A.H.J.; 1K99GM141449-01 MOSAIC grant to C.P.M. and NSF grant MCB  
277 #2011577I and NIH T32 5T32GM133353 to S.A.M.

278 **Data and materials availability:** All data are available in the main text or the supplementary  
279 materials.

280 **Ethics Declaration, Project Title,** Promoting Engagement in science for underrepresented  
281 Ethnic and Racial minorities (P.E.E.R), 21-MortonD-HSR-SOM-01, Kaiser Foundation  
282 Research Institute FWA: FWA00002344

283 **Ethics Approval and consent to participate,** Yes

284 **Consent for publication, Yes**

285 **Competing interests:** Authors declare that they have no competing interests.

286

287

288

289

290

291

292

293

294

295 **Table 1. Pre- and post-workshop evaluations.**

| <b>Pre-workshop survey questions</b>                                                     | <b>Post-workshop survey questions</b>                                                          |
|------------------------------------------------------------------------------------------|------------------------------------------------------------------------------------------------|
| On a scale of 1 to 10, do you think the presentation will keep you well informed?        | On a scale of 1 to 10, how did you like the presentation?                                      |
| On a scale of 1 to 10, how do you think the talk will improve your verbal and non-verbal | On a scale of 1 to 10, how do you think the talk helped you improve your verbal and non-verbal |

|                                                                                                               |                                                                                                                          |
|---------------------------------------------------------------------------------------------------------------|--------------------------------------------------------------------------------------------------------------------------|
| communication?                                                                                                | communication?                                                                                                           |
| On a scale of 1 to 10, how well do you think the talk will improve your networking skills?                    | On a scale of 1 to 10, how much do you think the talk helped you improve your networking skills?                         |
| On a scale of 1 to 10, how do you think the talk will improve your understanding of what a support team does? | On a scale of 1 to 10, how much do you think the talk helped you improve your understanding of what a support team does? |

296

297

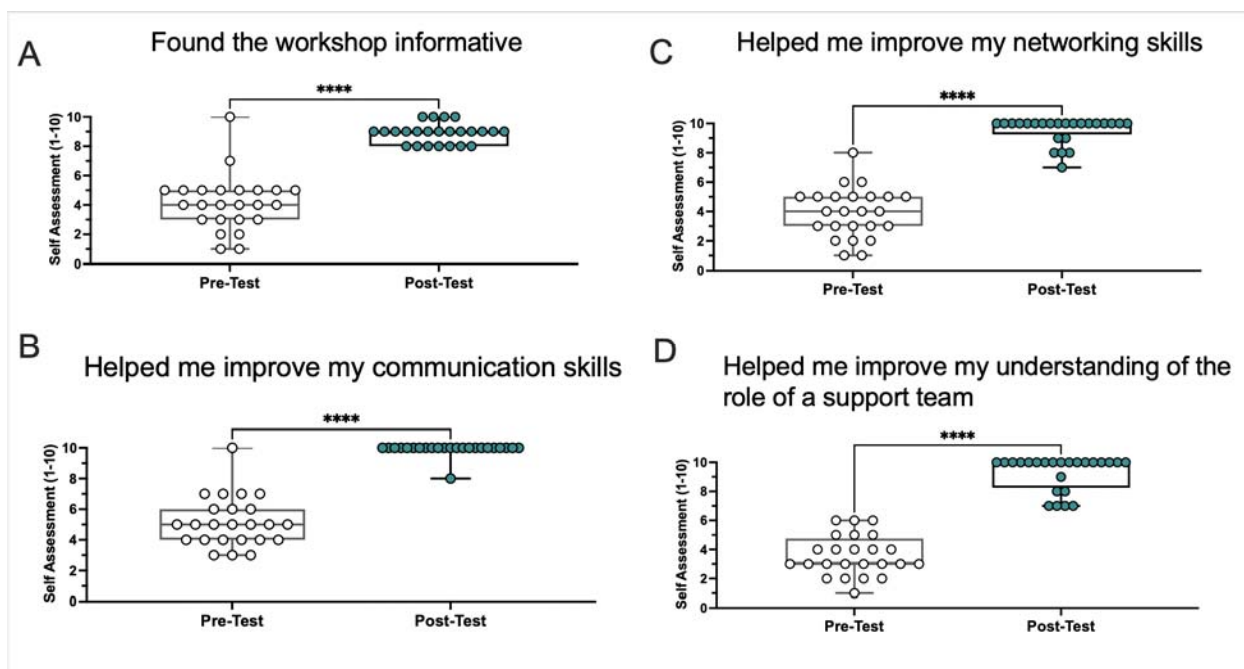

298

299 **Figure 1. Results from pre- and post-workshop evaluations.** These pre- and post-workshop  
300 questions were also used to evaluate mentees' knowledge regarding mentee-mentor  
301 relationships. **A.** The informativeness of the workshop. **B.** How much the workshop improved



302 communication skills. **C.** How much the workshop improved networking skills. **D.** How much  
303 the workshop improved understanding of support teams and assistive roles.

304
